# Supplementary material
Source: publisher figshare collection journal article supplement (https://karger.figshare.com/ndownloader/files/14992772)
Supplement: Supplementary file 1 [file 14992772]

**Supplementary table 1 –** Prevalence of obesity among children aged 6-9 years, by breastfeeding practice and countrya. COSI round 4 (2015/2017)

|  | **Duration of any breastfeeding (%)** | | | **Duration of exclusive breastfeeding (%)** | | | **Overall** |
| --- | --- | --- | --- | --- | --- | --- | --- |
| **Never** | **Less than 6 months** | **At least 6 months** | **Never** | **Less than 6 months** | **At least 6 months** |
| **Country-specific estimates** | | | | | | | |
| ALB | 14.4 (6.5-28.8) | 12.6 (7.0-21.7) | 9.2 (6.9-12.2) | - | - | - | 10.0 (7.3-13.4) |
| BUL e | 14.5 (11.7-17.8) | 15.3 (13.1-17.8) | 11.8 (10.1-13.7) | 15.6 (13.2-18.2) | 13.7 (11.7-15.8) | 11.9 (9.2-15.3) | 13.6 (12.2-15.1) |
| CRO d | 20.6 (15.4-27) | 15.1 (12.6-18) | 11.3 (9.7-13.2) | - | - | - | 13.5 (12.1-15.1) |
| CZH c | 10.6 (6.8-16.2) | 10.4 (7.6-14.1) | 5.1 (3.6-7.3) | - | - | - | 6.9 (5.4-8.6) |
| DEN | 6.7 (2.6-16.2) | 2.9 (0.8-10.0) | 3.0 (1.7-5.1) | - | - | - | 3.4 (2.1-5.3) |
| FRA | 7.2 (5.6-9.3) | 6.9 (5.4-8.7) | 7.4 (5.5-9.7) | - | - | - | 7.1 (6.1-8.3) |
| GEO | 12.4 (9.2-16.5) | 8.3 (6.5-10.6) | 8.4 (7.1-10) | 11.3 (8.4-15) | 8.3 (6.9-10.1) | 8.6 (6.9-10.8) | 8.9 (7.8-10.2) |
| IRE | 4.1 (2.2-7.5) | 6.0 (3.2-10.8) | 7.5 (4.0-13.6) | 4.0 (2.2-7.2) | 6.8 (4.2-10.9) | 7.2 (3.2-15.3) | 5.5 (3.9-7.7) |
| ITA d | 21.2 (19.6-22.9) | 17.6 (16.8-18.3) | 15 (14.3-15.7) | - | - | - | 16.8 (16.3-17.4) |
| KAZ b | 12.3 (6.0-23.7) | 5.9 (2.8-12.0) | 5.2 (4.0-6.8) | 12.3 (6.0-23.7) | 6.8 (4.3-10.4) | 6.0 (4.8-7.6) | 5.6 (4.3-7.4) |
| LTU b; f | 12.8 (9.8-16.6) | 10.9 (9.3-12.7) | 8.7 (7.1-10.6) | 11.9 (9.1-15.5) | 10.5 (9.1-12.2) | 7.1 (5.4-9.2) | 10.1 (8.8-11.6) |
| LVA b | 10.5 (7.7-14.2) | 9.5 (7.9-11.3) | 7.3 (6.4-8.2) | 10.6 (8.1-13.8) | 8.3 (7.2-9.5) | 7.1 (5.7-8.8) | 8.2 (7.4-9.1) |
| MAT d | 21.2 (19.9-22.5) | 16.1 (15.0-17.3) | 13.4 (12.1-14.8) | - | - | - | 17.2 (16.5-18.0) |
| MNE d | 19.9 (15.2-25.6) | 12.1 (9.7-15.0) | 10.8 (9.1-12.7) | - | - | - | 12.3 (10.7-14.2) |
| POL b; f | 15.0 (11.4-19.4) | 14.2 (10.5-18.9) | 11.2 (8.9-14.0) | 14.3 (11.5-17.6) | 13.3 (9.3-18.5) | 6.4 (3.9-10.5) | 12.6 (9.9-15.8) |
| POR b; f | 15.8 (13.0-19.2) | 11.1 (9.5-12.9) | 10.9 (9.5-12.5) | 15.3 (12.7-18.4) | 10.1 (8.9-11.5) | 11.1 (9.0-13.6) | 11.6 (10.6-12.7) |
| ROM | 12.7 (10.0-15.9) | 11.0 (8.9-13.4) | 10.4 (9.1-11.8) | - | - | - | 10.8 (9.6-12.1) |
| RUS b | 9.5 (5.5-15.9) | 11.8 (9.2-15) | 7.6 (6.0-9.7) | 9.7 (6.1-15.0) | 9.2 (7.4-11.5) | 7.4 (5.4-10.1) | 9.1 (7.5-10.9) |
| SMR | 9.1 (5.7-16.9) | 12.5 (9.4-16.5) | 12.9 (10.5-15.7) | - | - | - | 12.5 (10.6-14.6) |
| SPA c; e | 21.0 (18.7-23.5) | 17.4 (15.4-19.7) | 16.2 (14.3-18.2) | 21 (18.7-23.5) | 16.6 (14.5-19) | 17.6 (15.6-19.7) | 17.7 (16.3-19.2) |
| TJK | 2.7 (0.4-17.5) | 3.8 (0.9-14.4) | 1.3 (0.8-2.0) | 2.7 (0.4-17.2) | 1.0 (0.3-3.3) | 1.5 (0.9-2.4) | 1.4 (0.9-2.1) |
| TKM | 3.2 (0.8-11.2) | 3.1 (1.0-8.9) | 3.4 (2.7-4.3) | 3.2 (0.8-11.2) | 4.1 (2.8-6.0) | 2.7 (2.0-3.6) | 3.4 (2.7-4.2) |
|  |  |  |  |  |  |  |  |
| **Pooled estimatesc;f;g** | | | | | | | |
|  | 11.7 (9.7-14.1) | 11.4 (9.9-13.2) | 9.2 (8.3-9.9) | 16.8 (14.8-19.0) | 13.2 (11.5-15.1) | 9.3 (7.9-10.8) | 10.4 (9.6-11.3) |

a For Italy and San Marino Republic, the figures about breastfeeding duration referred to the following categories: “Never”; “Up to 6 months”; “More than 6 months”.

b; c; d Statistically significant difference of proportions between any breastfeeding duration categories for obesity (based on WHO definition) - Pearson's chi-squared corrected using Rao-Scott method, p-value<0.05 (b); p-value <0.01 (c); p-value <0.001 (d).

e; f Statistically significant difference of proportions between exclusive breastfeeding duration categories for obesity (based on WHO definition) - Pearson's chi-squared corrected using Rao-Scott method, p-value<0.05 (e); p-value <0.01 (f).

gPooled estimates overall and by general breastfeeding were obtained including children from the following countries and age groups: 7-year-olds from Bulgaria, Czechia, Georgia, Latvia, Lithuania, Malta, Montenegro, Portugal, Spain and Turkmenistan; 8-year-olds from Albania, Croatia, France, Poland and Romania; 9-year-olds from Kazakhstan. Pooled estimates by exclusive breastfeeding were obtained including children from the following countries and age groups: 7-year-olds from Bulgaria, Georgia, Latvia, Lithuania, Portugal and Spain; 8-year-olds from Poland; 9-year-olds from Kazakhstan.
